# Supplementary material for: Antimycobacterial and antimalarial activities of endophytic fungi associated with the ancient and narrowly endemic neotropical plant Vellozia gigantea from Brazil
Source: PubMed Central journal article supplement (PMC5607518; doi:10.1590/0074-02760170144), 2017-10
Supplement: 0074-0276-mioc-112-10-0692-suppl01.pdf [file 0074-0276-mioc-112-10-0692-suppl01.pdf]

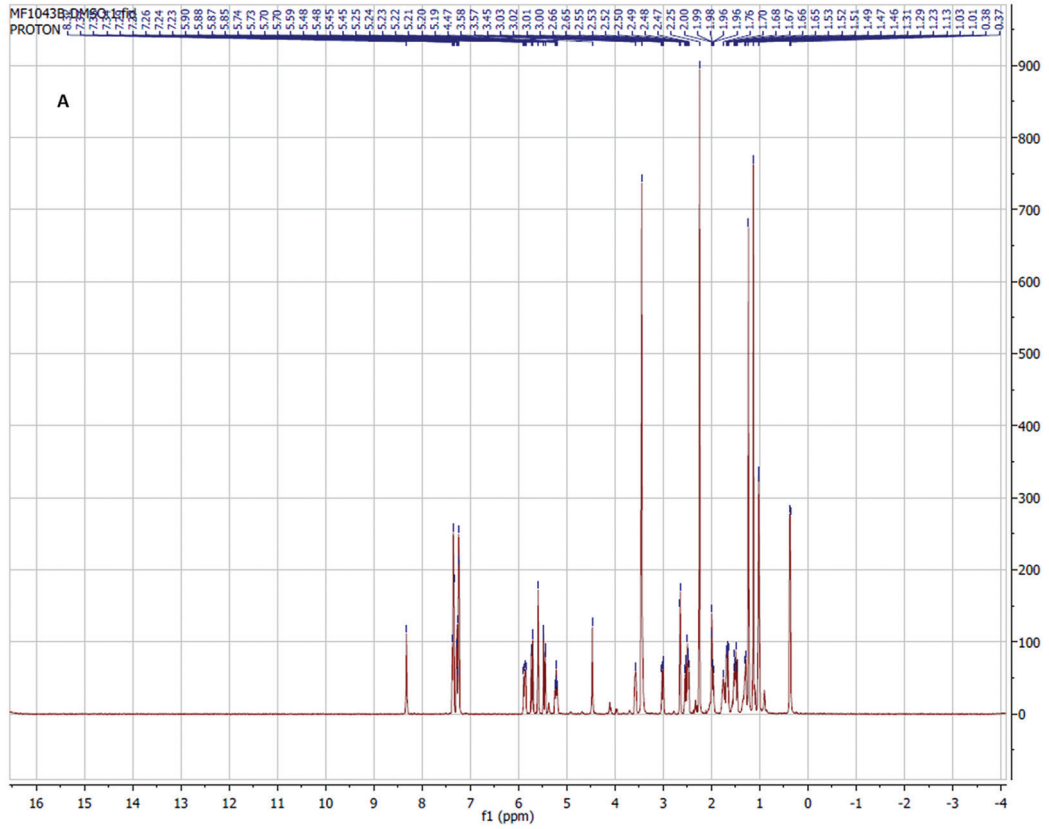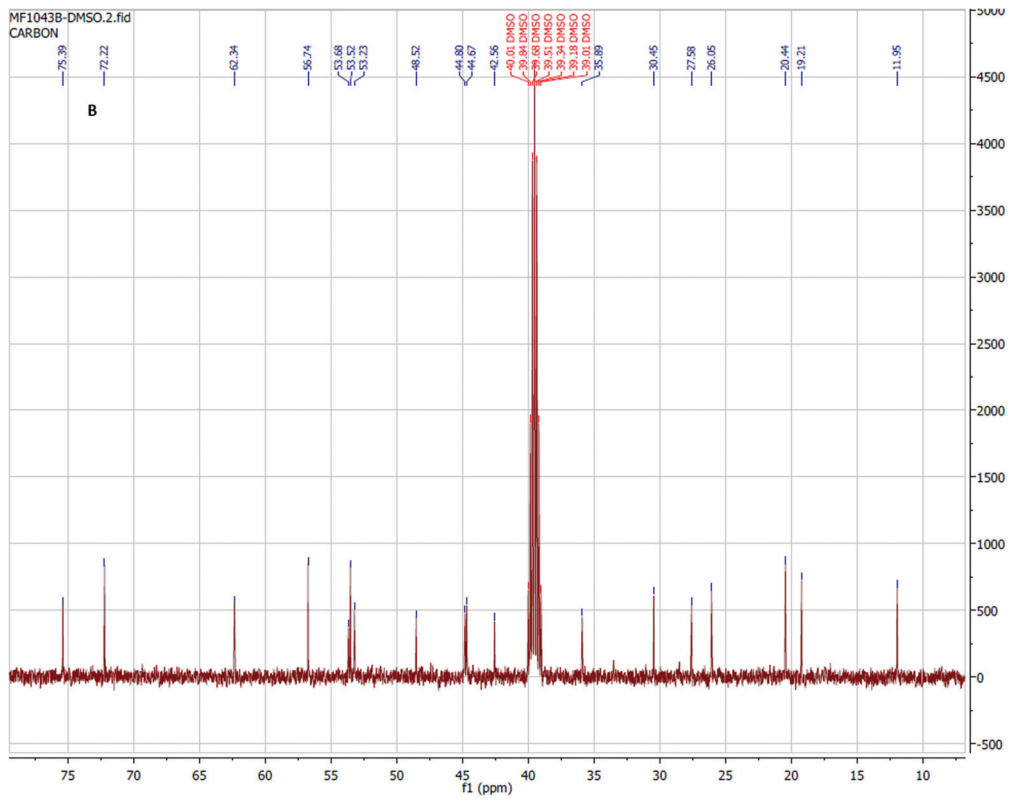

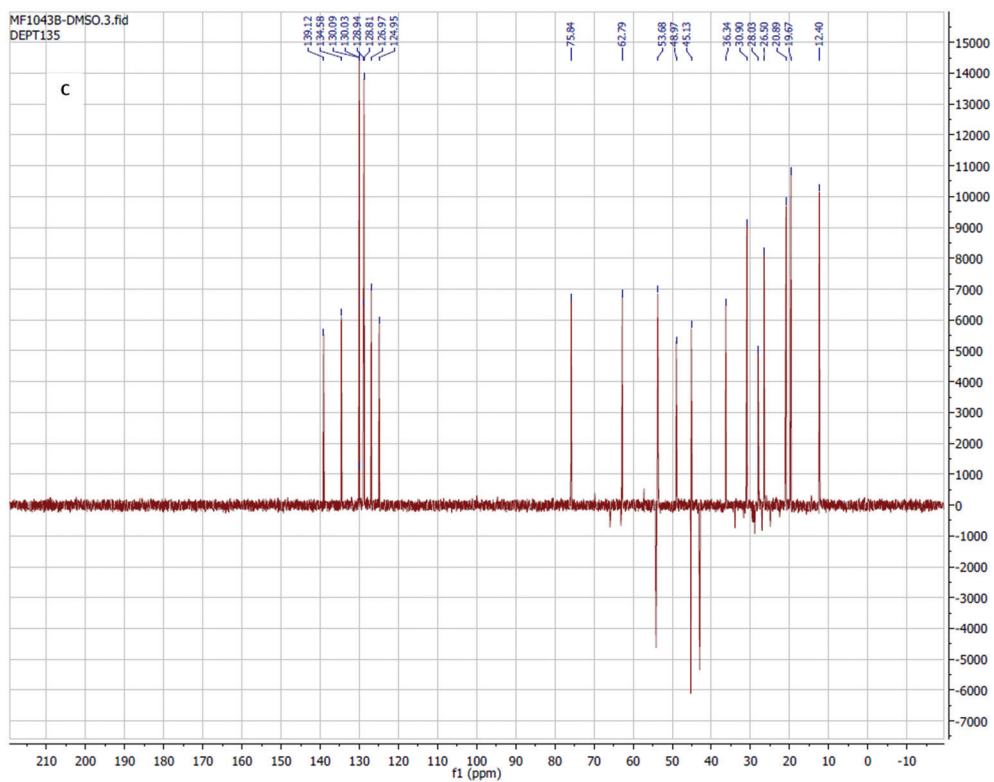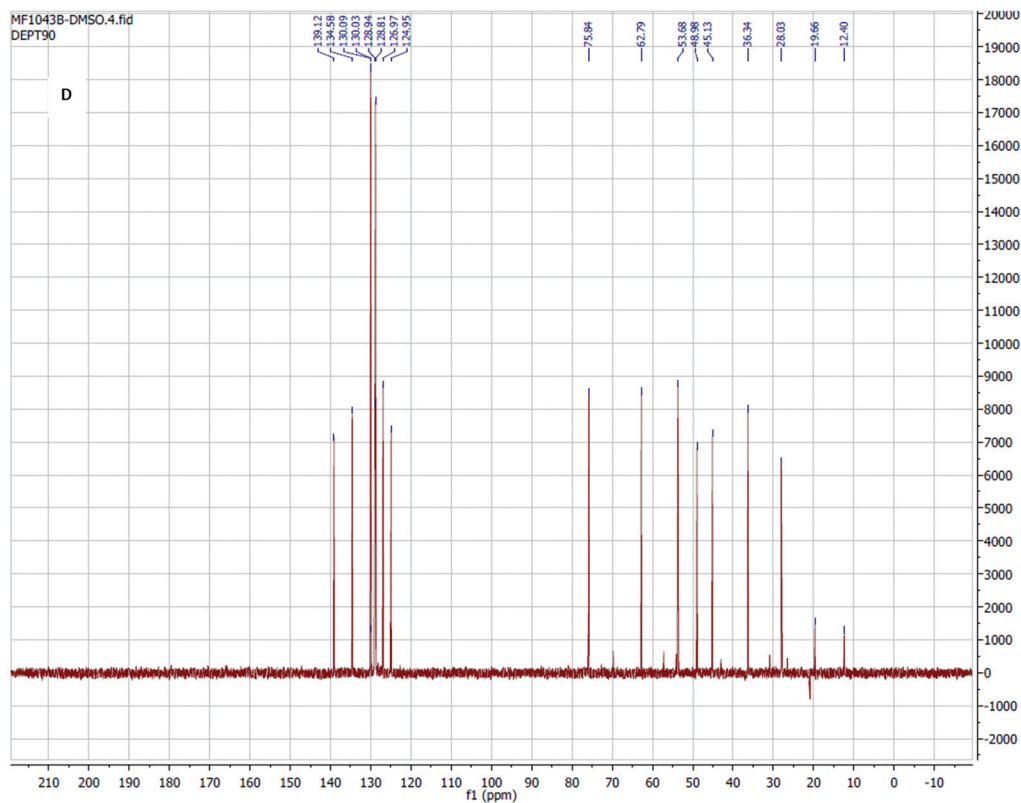

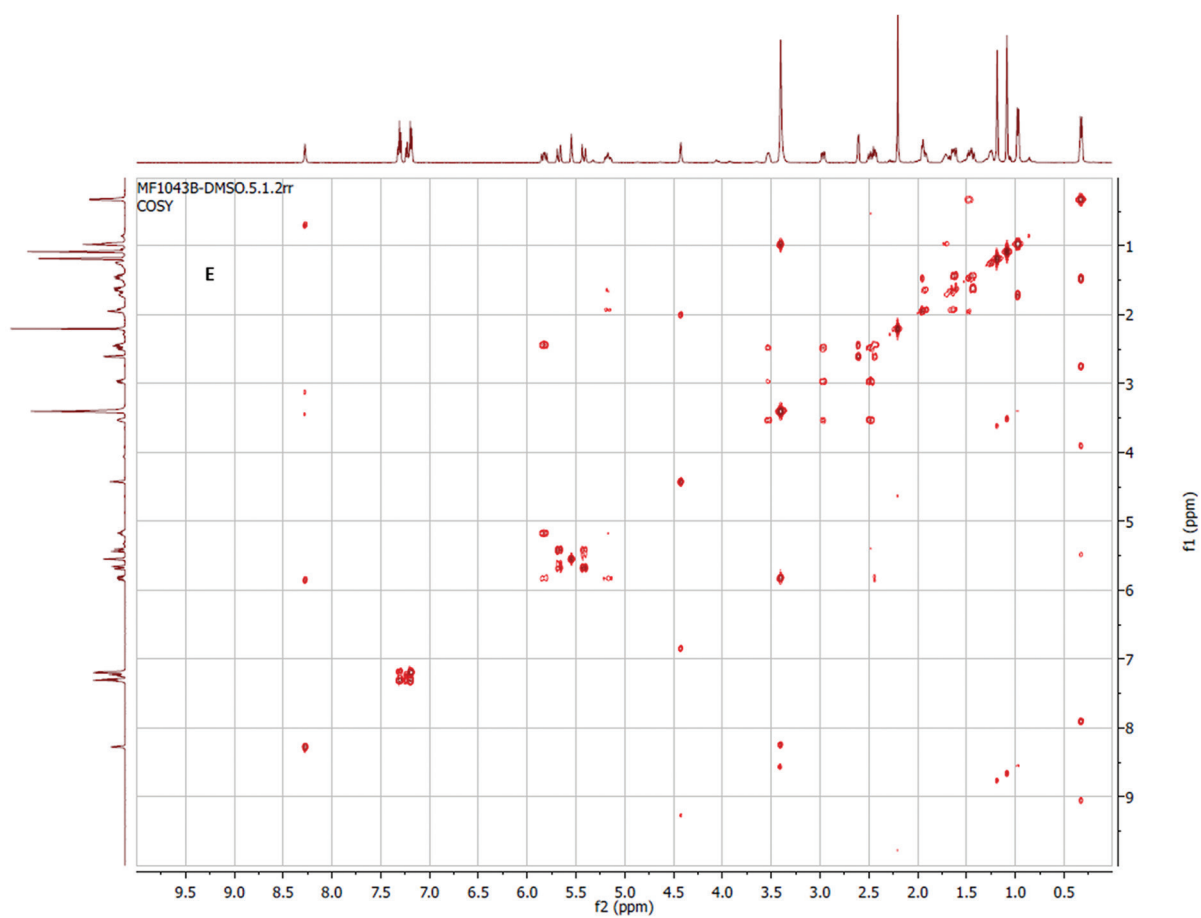

Nuclear Magnetic Resonance spectra of the epoxychothalasin H. (A) = proton; (B) = carbon; (C) = DEPT135; (D) = DEPT 90; (E) = COSY.
